# Supplementary material for: Rab35, acting through ACAP2 switching off Arf6, negatively regulates oligodendrocyte differentiation and myelination
Source: PubMed Central journal article supplement — Mol Biol Cell. 2014 May 1;25(9):1532–42. doi: 10.1091/mbc.E13-10-0600 (PMC4004601; doi:10.1091/mbc.e13-10-0600), 2014-05-01

# Supplemental Materials

*Molecular Biology of the Cell*

Miyamoto et al.

## Supplemental figure legends

**Figure S1. Arf6 acts downstream of Rab35 and ACAP2.** (A, C) Cells were transfected with an siRNA for control, Rab35 (A), or ACAP2 (C), allowed to differentiate for three days, and lysed to be used for an affinity-precipitation of active GTP-bound Arf6. Immunoblots for each total protein are also shown. (B, D) Bands corresponding to each GTP-bound Arf6 protein were scanned and semi-quantified (n=4). Data were evaluated with the Student's *t* test (\*,  $p < 0.01$ ).

**Figure S2. Rab35/ACAP2/Arf6 is required for oligodendrocyte differentiation.** (A) Primary OPCs infected with an shRNA for control, Rab35, ACAP2, or Arf6 were allowed to differentiate for three days and stained with an anti-MBP antibody (red) and DAPI (blue). Representative images are shown. The scale bar indicates 100  $\mu\text{m}$ . (B) The percentages of the MBP-positive cells were counted (n=10 fields in three experiments). Data were evaluated with one-way ANOVA (\*,  $p < 0.01$ ). (C-E) Cells were transfected with an shRNA for control, Rab35, ACAP2, or Arf6 and immunoblotted with an antibody against Rab35, ACAP2, Arf6, MBP, or  $\beta$ -actin.

**Figure S3. Analysis of Rab35/ACAP2/Arf6 in spinal cord development.** (A) Postnatal mouse spinal cords were lysed to be used in an affinity-precipitation to detect active GTP-bound Rab35 or Arf6. Immunoblots for total Rab35, ACAP2, Arf6, cytohesin-2, and MBP are also shown.

**Figure S4. Cytohesin is required for FBD-102b cell differentiation.** (A) Cells were allowed to differentiate with or without 10  $\mu$ M SecinH3 for three days. Representative images are shown. The scale bar indicates 100  $\mu$ m. (B) The percentage of cells in stage 3 was counted (n=10 fields in three experiments). (C) Cells were lysed and immunoblotted with an antibody against MBP or  $\beta$ -actin. (D) The bands of each MBP protein were semi-quantified (n=4). Data were evaluated with the Student's *t* test (\*,  $p < 0.01$ ). (E) Immunoblotting for cytohesin members in FBD-102 cells and 293T (positive control) were performed. Immunoblots for  $\beta$ -actin are also shown.

**Figure S5. Cytohesin-2 is activated following differentiation in FBD-102b cells.** (A) Cells were allowed to differentiate for 0-3 days and lysed to be used for an affinity-precipitation to detect active cytohesin-2 with recombinant GST-tagged nucleotide-free Arf6. Immunoblots for total cytohesin-2 and  $\beta$ -actin are also shown. (B) Bands corresponding to each active cytohesin-2 protein were scanned and semi-quantified (n=3). Data were evaluated with one-way ANOVA (\*,  $p < 0.01$ , \*\*,  $p < 0.05$ ).

**Figure S6. Cytohesin-2 is required for oligodendrocyte differentiation.** (A) Primary OPCs were allowed to differentiate with or without 10  $\mu$ M SecinH3 for three days and stained with an anti-MBP antibody (red) and DAPI (blue). Representative images are shown. The scale bar indicates 100  $\mu$ m. (B) The percentages of the MBP-positive cells were counted (n=10 fields in three experiments). (C) Cells were lysed and immunoblotted with an

antibody against MBP or  $\beta$ -actin. Data were evaluated with the Student's *t* test (\*,  $p < 0.01$ ).

**Figure S7. Rab35 forms a complex with ACAP2/Arf6/cytohesin-2.** (A) FBD-102b cells were allowed to differentiate for 0 or 3 days, lysed, and immunoprecipitated with an anti-cytohesin-2 antibody. Immunoprecipitates were immunoblotted with an anti-Rab35, ACAP2, or Arf6 antibody. Immunoblots for total Rab35, ACAP2, Arf6, and cytohesin-2 are also shown.

# Figure S1

**A**

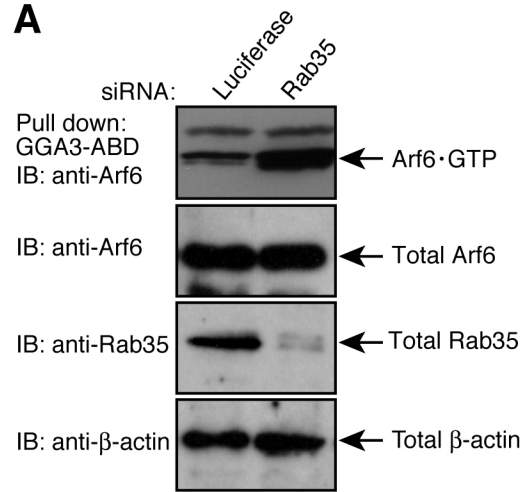

**B**

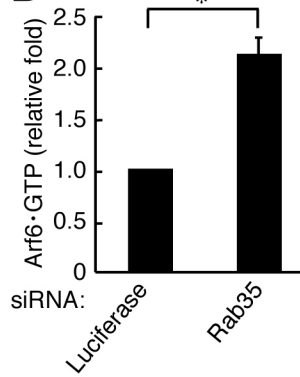

**C**

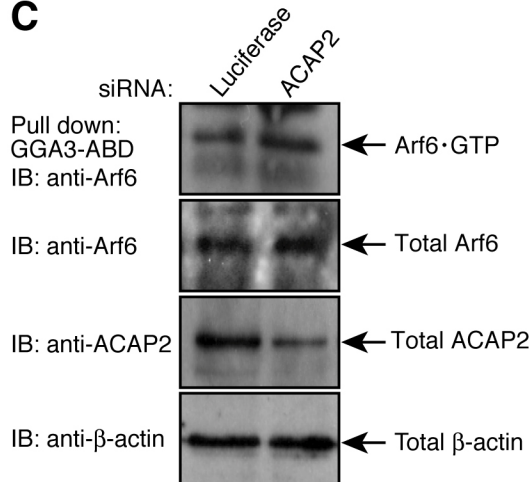

**D**

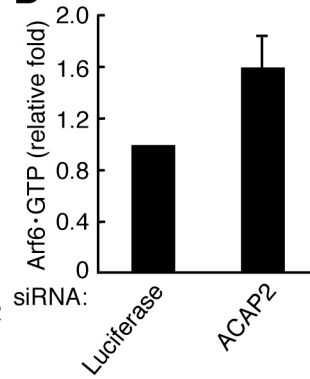

**Figure S2**

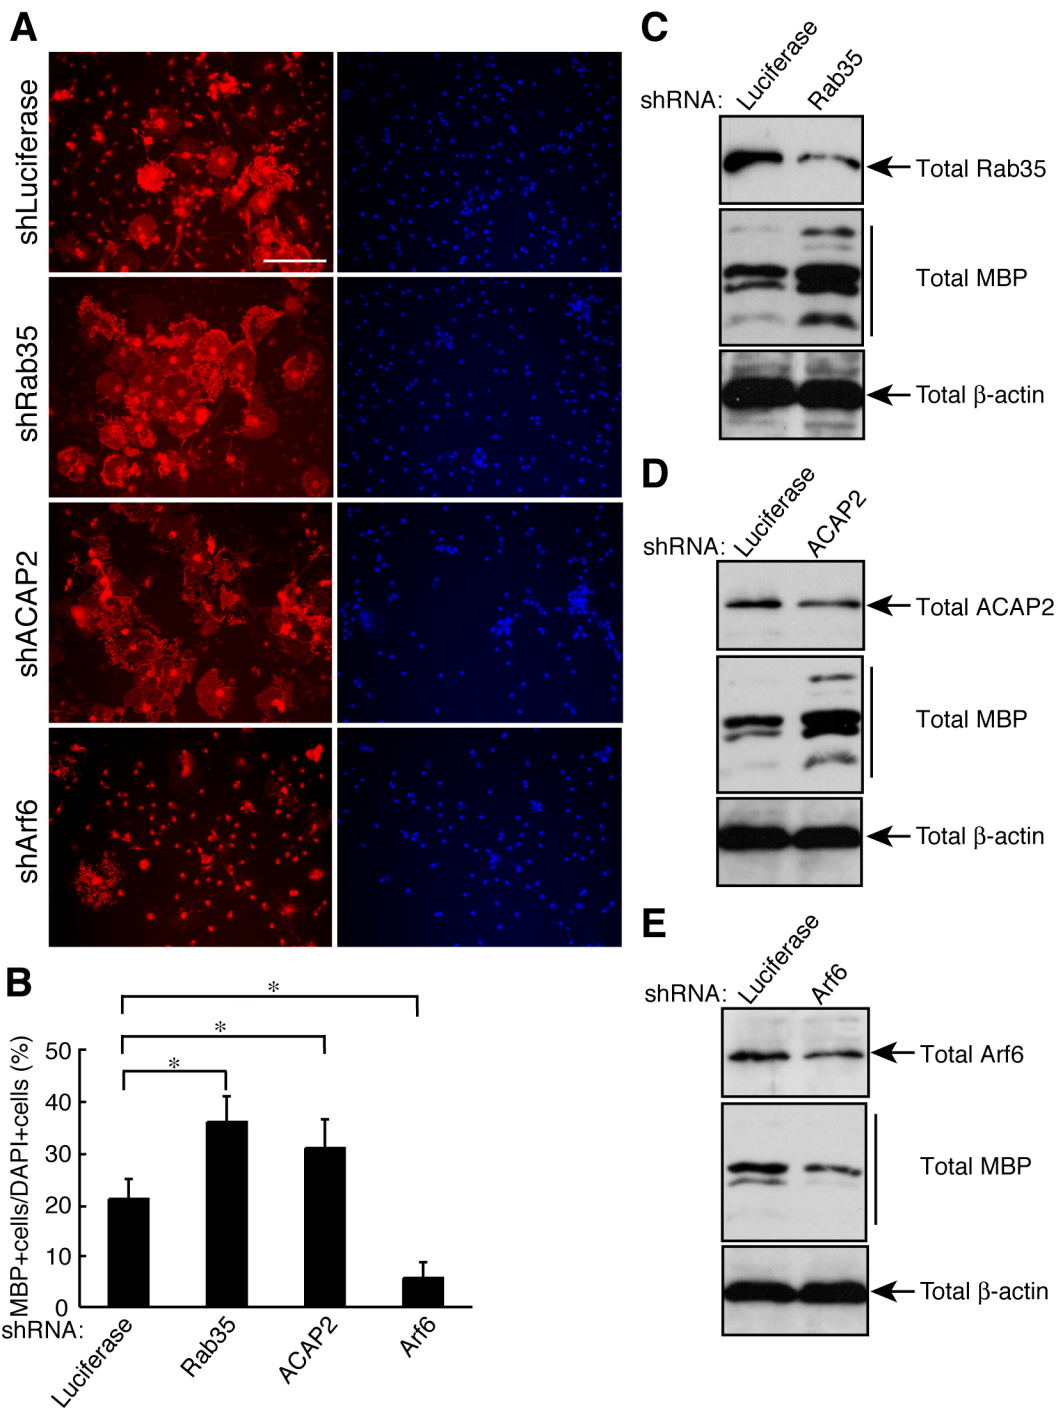

### Figure S3

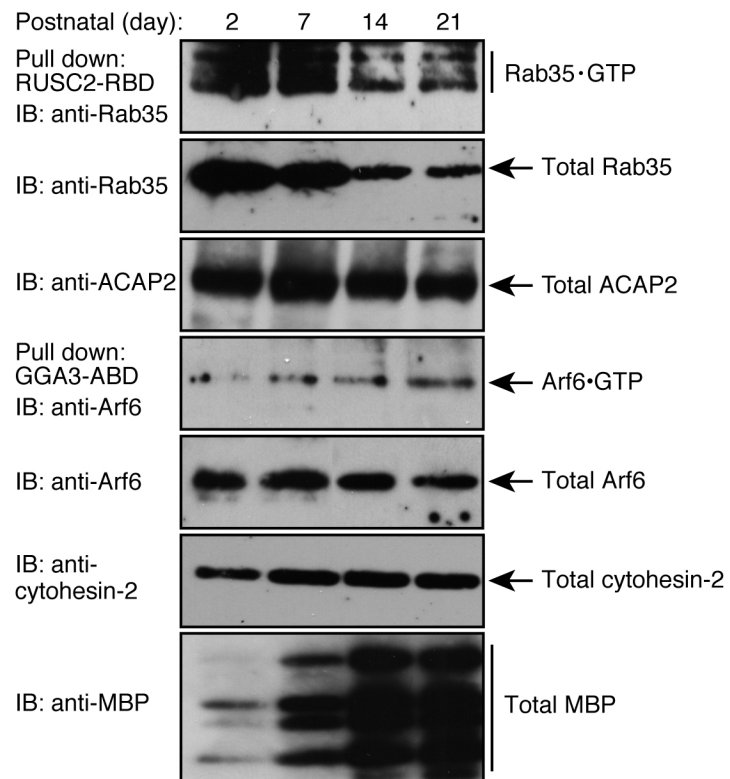

**Figure S4**

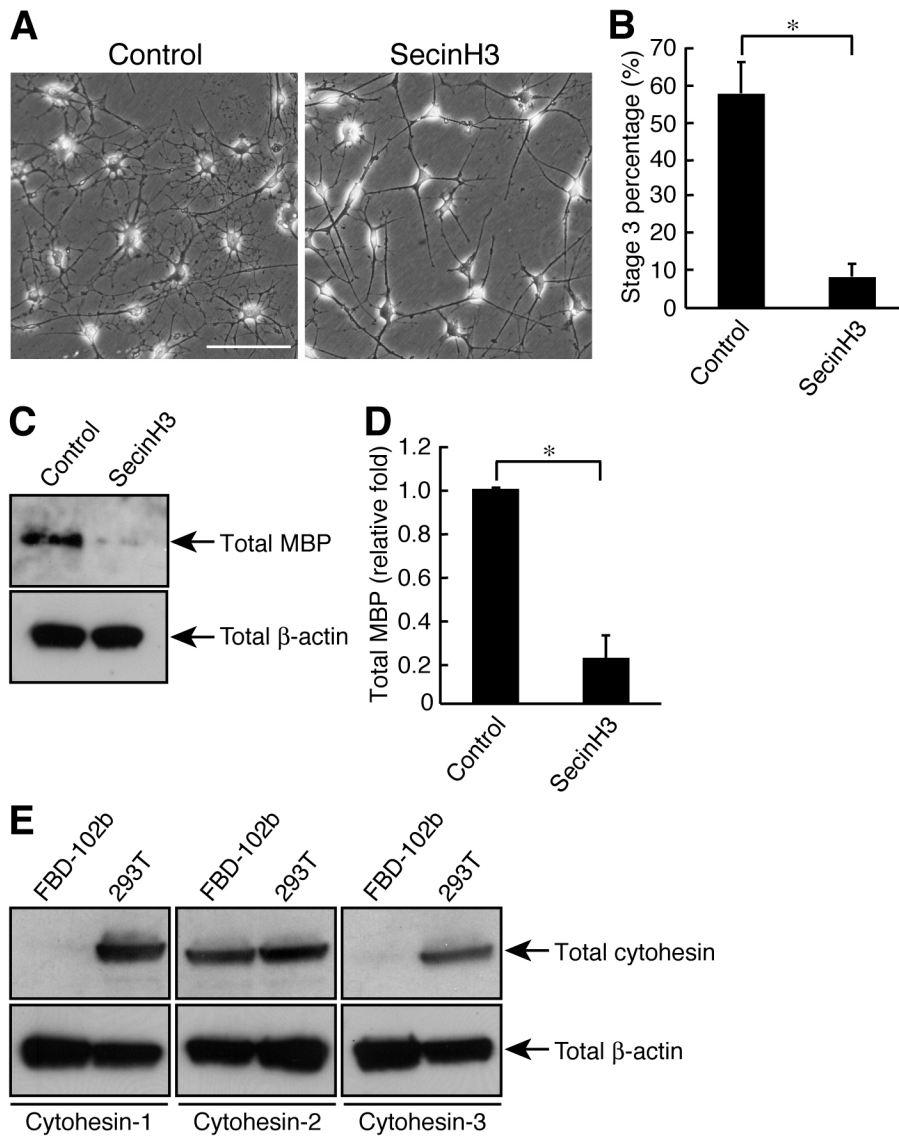



## Figure S5

**A**

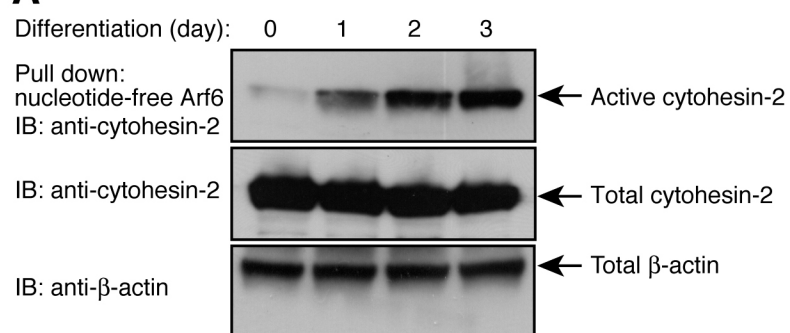

**B**

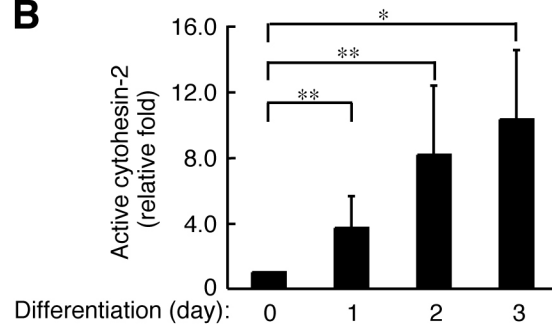

**Figure S6**

**A**

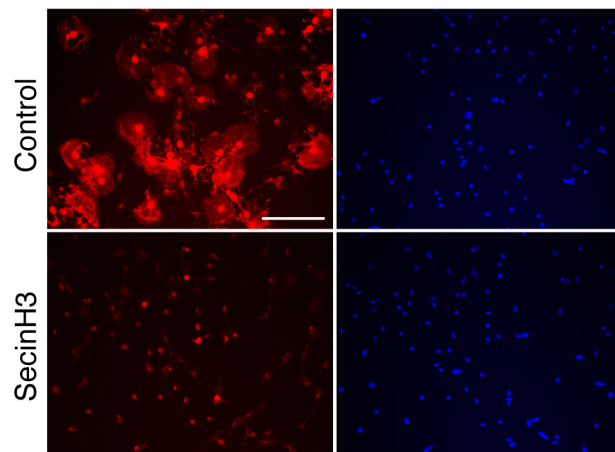

**B**

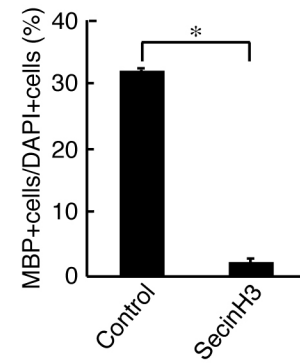

**C**

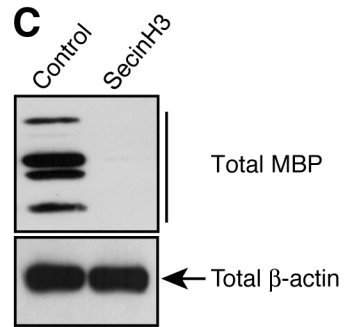

## Figure S7

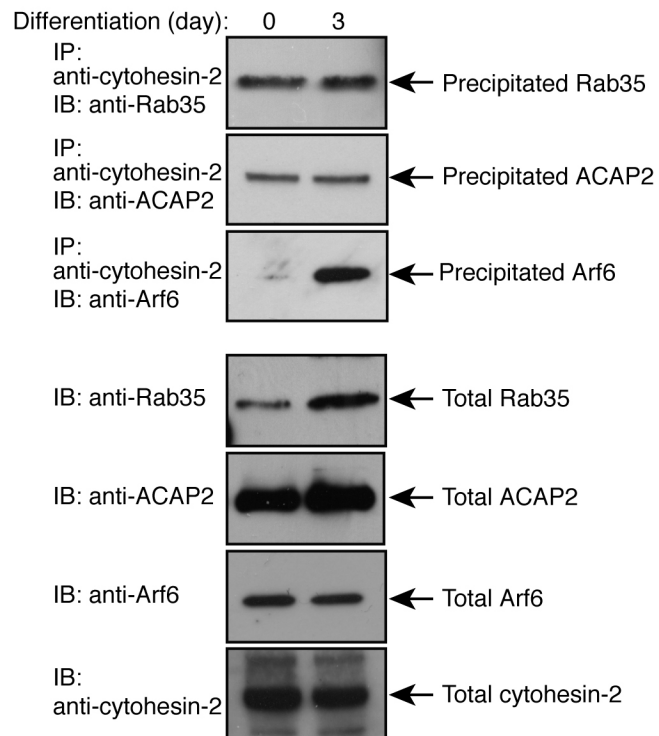

Supplement: supp_E13-10-0600v1_CombinedSupMats.pdf [file supp_E13-10-0600v1_CombinedSupMats.pdf]
